# Supplementary material for: miR-25 Promotes Cardiomyocyte Proliferation by Targeting FBXW7
Source: PubMed Central journal article supplement — Mol Ther Nucleic Acids. 2020 Jan 21;19:1299–308. doi: 10.1016/j.omtn.2020.01.013 (PMC7044498; doi:10.1016/j.omtn.2020.01.013), 2020-01-21
Supplement: mmc1.pdf [file mmc1.pdf]

OMTN, Volume 19

## Supplemental Information

### miR-25 Promotes Cardiomyocyte

### Proliferation by Targeting *FBXW7*

Bei Wang, Mengting Xu, Miaomiao Li, Fujian Wu, Shijun Hu, Xiangbo Chen, Liquan Zhao, Zheyong Huang, Feng Lan, Dong Liu, and Yongming Wang

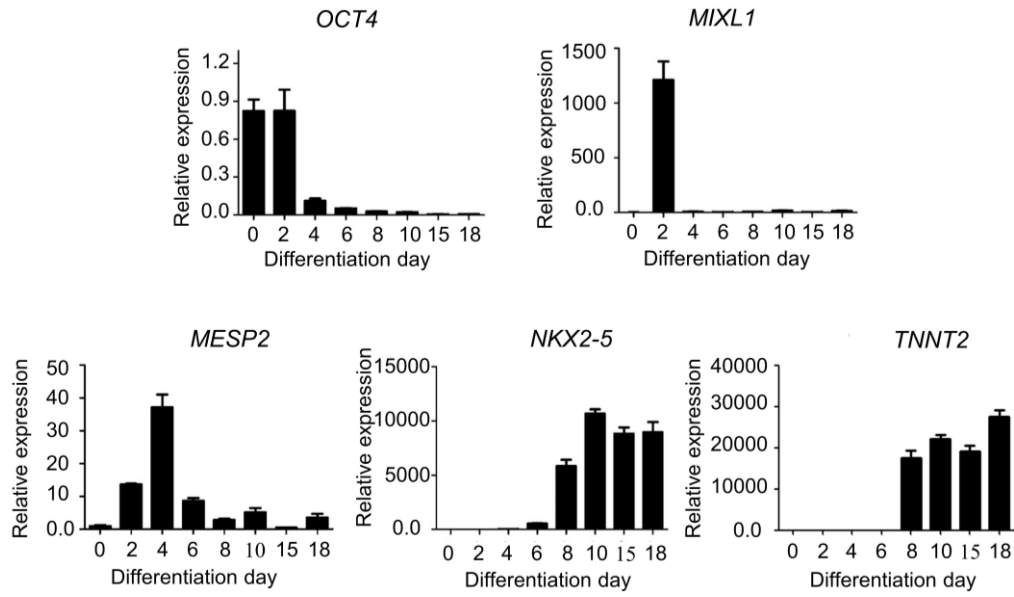

**Supplemental Figure 1.** Relative mRNA expression levels of marker genes for pluripotent stem cells (*OCT4*), mesendoderm (*MIXL1*), cardiac mesoderm (*MESP1*), cardiac progenitors (*NKX2-5*) and cardiomyocytes (*TNNT2*) were analyzed by qRT-PCR during CM differentiation (n=3, error bars show the mean  $\pm$  SEM).

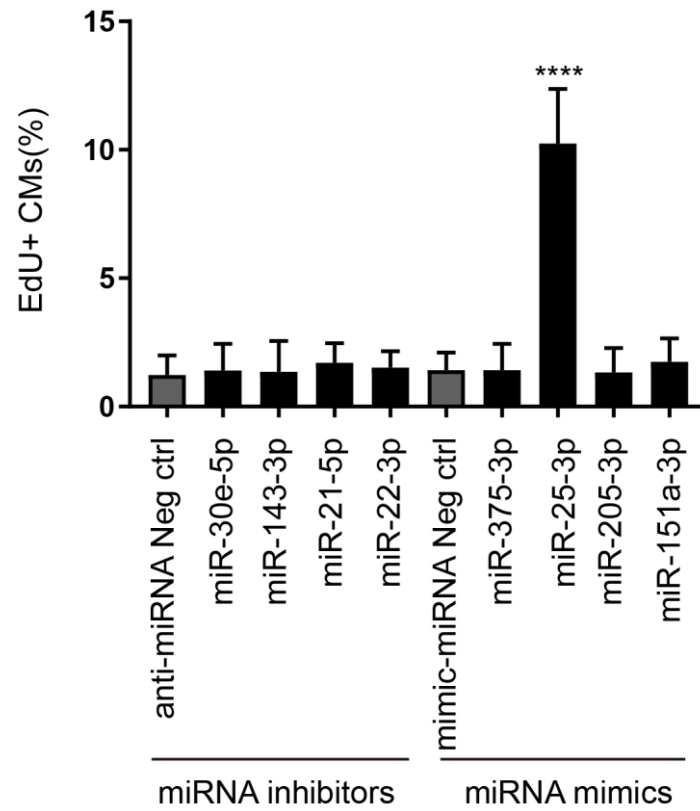

**Supplemental Figure 2.** Anti-miRNA and mimic-miRNA screen for hESC-CMs proliferation. The percentage of EdU+ and  $\alpha$ -ACTININ+ cells were quantificated using ImageJ. (n=3 per group, error bars showed mean $\pm$  SD).

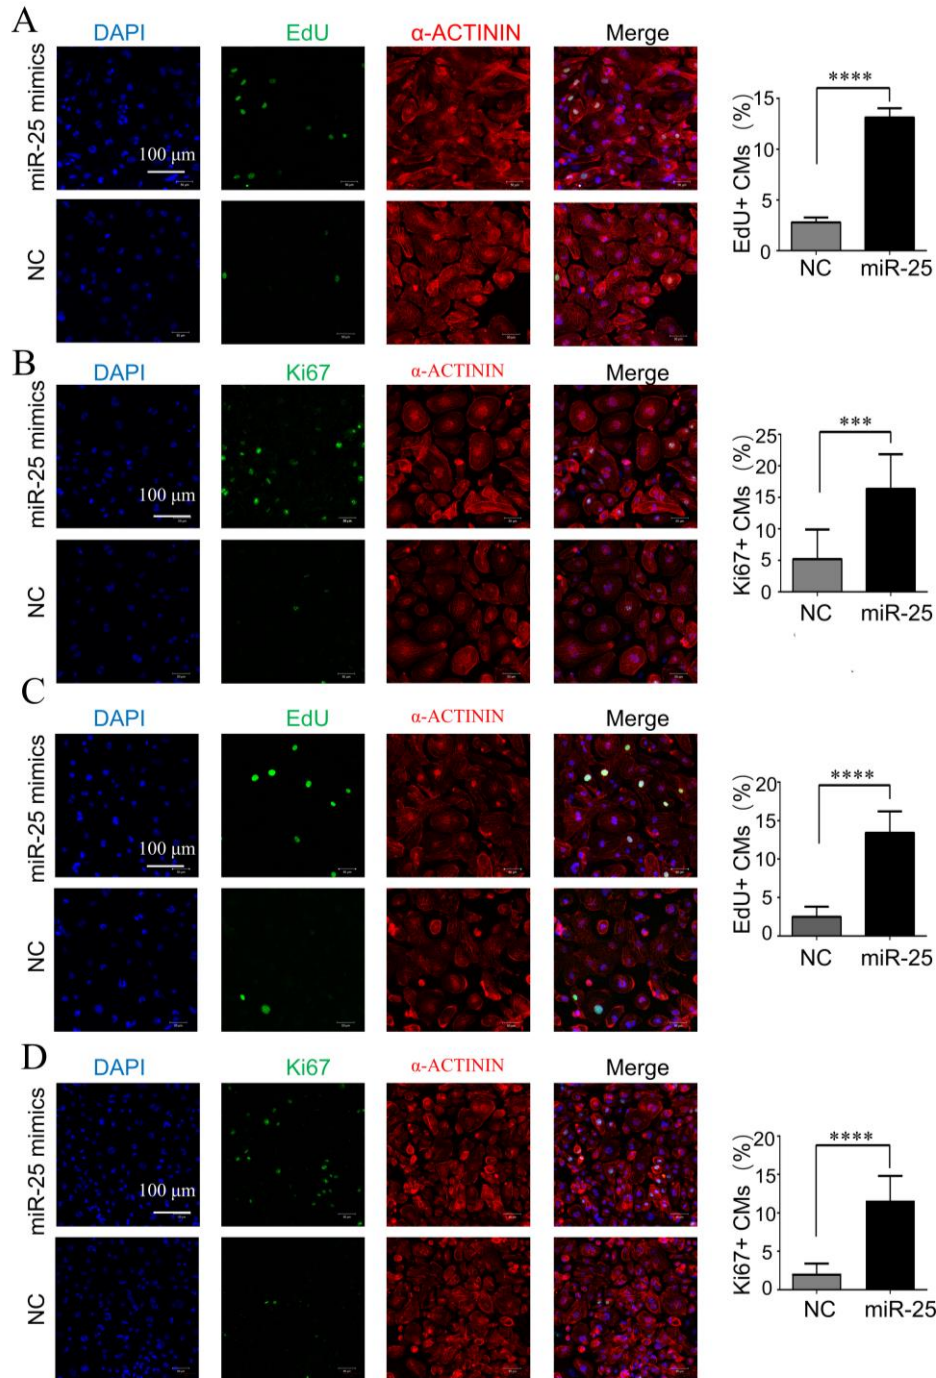

**Supplemental Figure 3. miR-25 overexpression promotes the proliferation of CMs derived from two hiPSC lines.** (A) EdU staining (green) revealed that miR-25 transfection increased the proliferation of CMs derived from hiPSC line 1. (B) Immunostaining of Ki-67 revealed that miR-25 transfection increased the proliferation of CMs derived from hiPSC line 1. (C) EdU staining (green) revealed that miR-25 transfection increased the proliferation of CMs derived from hiPSC line 2. (D) Immunostaining of Ki-67 revealed that miR-25 transfection increased the proliferation of CMs derived from hiPSC line 2. Nuclei were stained with DAPI (blue); CMs were stained with an antibody against  $\alpha$ -ACTININ (red). At least 2000 cells were quantified in each group.

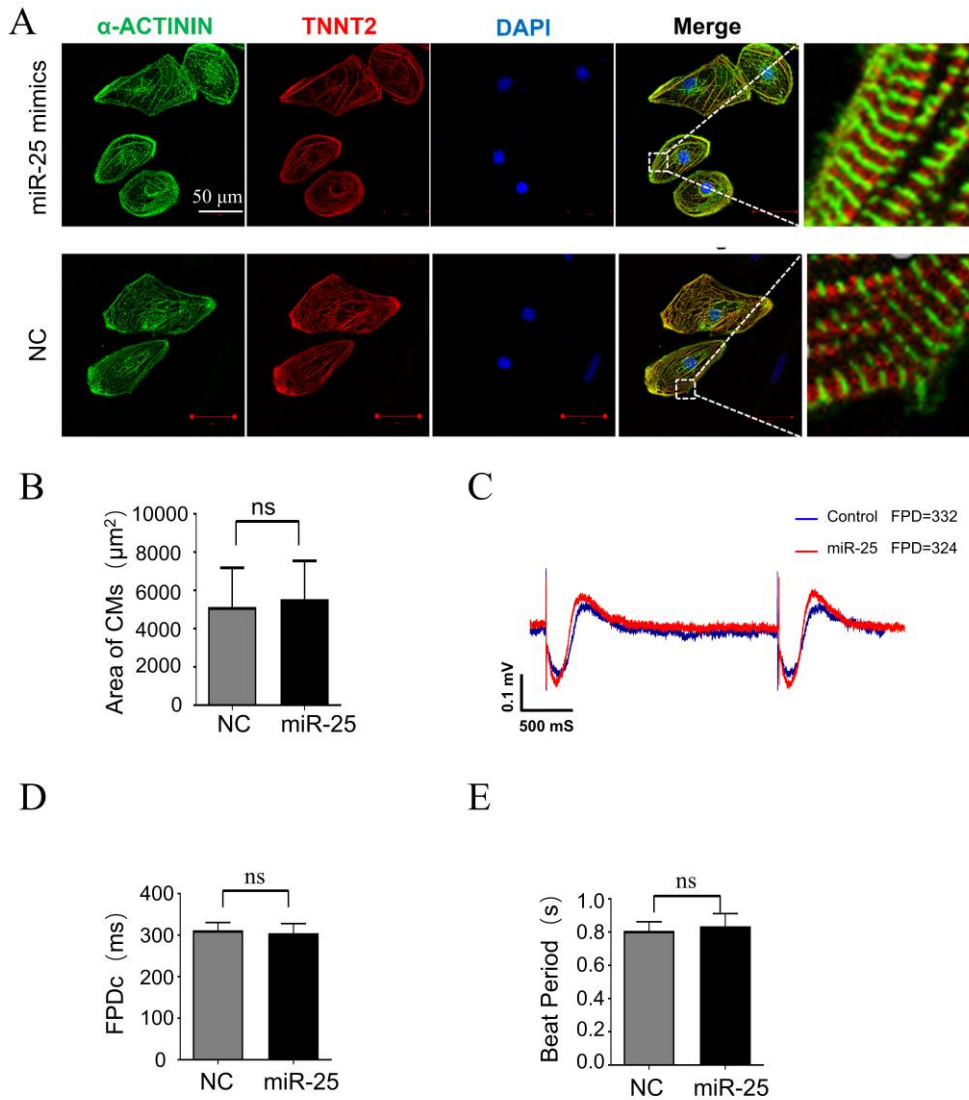

**Supplemental Figure 4. Overexpression of miR-25 did not influence CM morphology or electrical activity.** (A) Representative images of hESC-CMs transfected with miR-25 mimics or NC stained for  $\alpha$ -ACTININ (green), TNNT2 (red) and DAPI (blue). (B) Quantification of cell size. Approximately 60 cells for each group were analyzed. (C) Representative traces of average FPD recordings using the MEA system. (D, E) The results of field potential duration (FPD, Fridericia corrected) and beat period analysis ( $n=3$ , error bars show the mean  $\pm$  SEM).

A

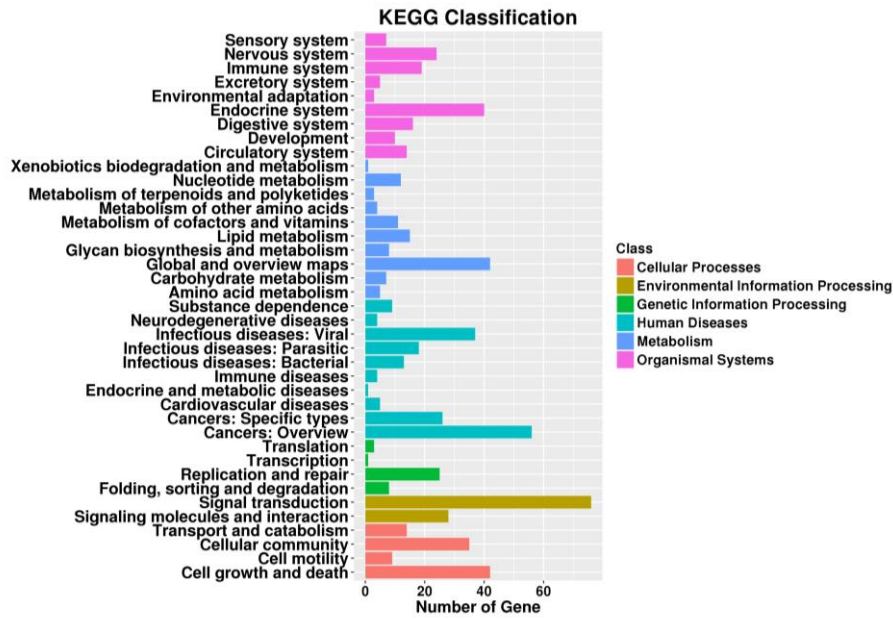

B

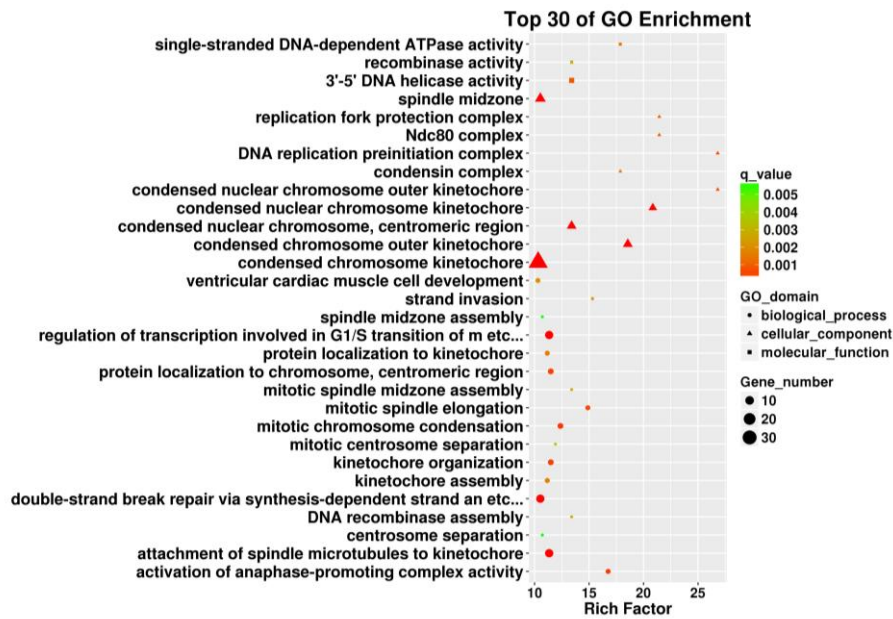

**Supplemental Figure 5. RNA-seq analysis revealed that miR-25 overexpression influenced the expression of multiple genes in hESC-CMs. (A) KEGG classification enrichment analysis of the differentially expressed genes in CMs transfected with miR-25. (B) GO enrichment analysis of the differentially expressed genes in CMs transfected with miR-25.**

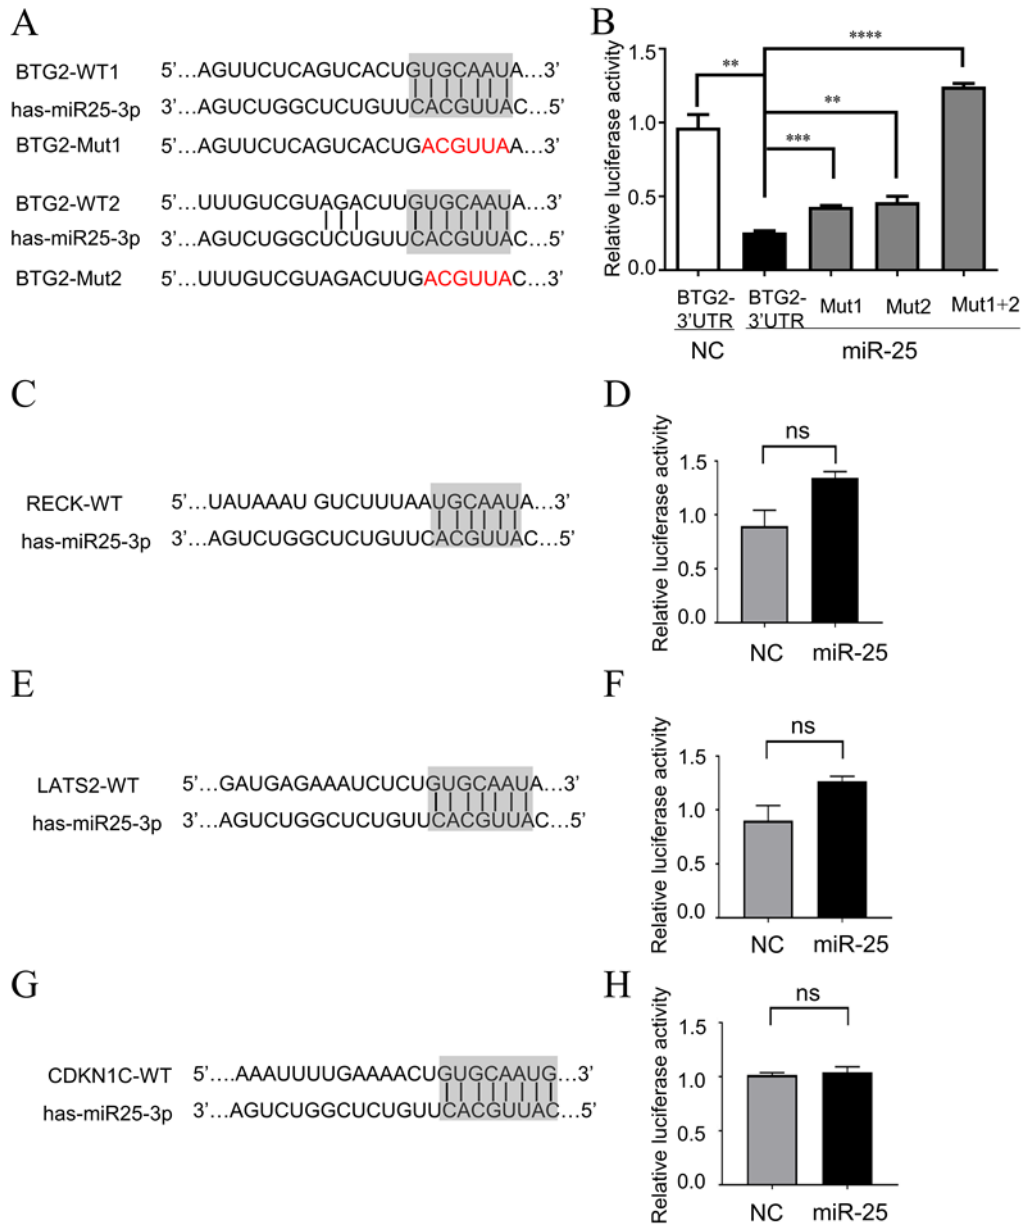

**Supplemental Figure 6. The potential targets of miR-25 were tested with a dual-luciferase assay.** The potential target sites (highlighted in gray) of miR-25 on the 3'-UTR of *BTG2* (A), *RECK* (C), *LATS2* (E) and *CDKN1C* (G) were predicted by TargetScan. The mutated target sequences for *BTG2* are marked in red. (B, D, F, H) Results of luciferase reporter assays for each gene (n=3, error bars show the mean  $\pm$  SEM); \*\*P<0.01; \*\*\*P<0.001; \*\*\*\*P<0.0001.

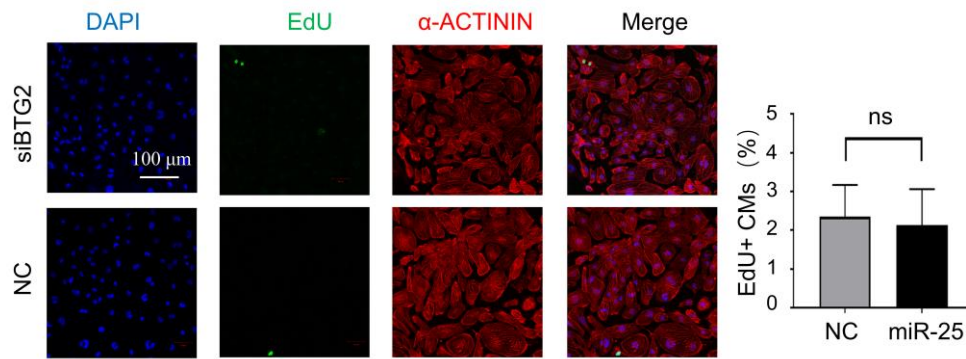

**Supplemental Figure 7. Knockdown of *BTG2* had no influence on CM proliferation.** EdU staining revealed that *BTG2* knockdown by siBTG2 had no influence on CM proliferation. Nuclei were stained with DAPI (blue); CMs were stained with an antibody against  $\alpha$ -ACTININ (red). At least 2000 cells were quantified in each group.



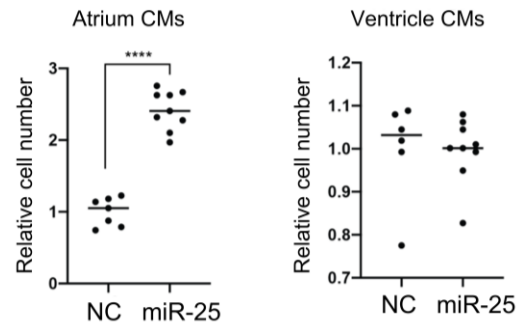

**Supplemental Figure 8. miR-25 shows more significant effect on the proliferation of atrium CMs.** miR-25 injection increased the atrium CMs number. A transgenic zebrafish line with myocardium-specific RFP expression in the nuclei was employed.

**Table S1. Primers and oligonucleotides**

| Name        | Sequence (5'-3')                                | Description                           |
|-------------|-------------------------------------------------|---------------------------------------|
| q-OCT4-F    | CCTGAAGCAGAAGAGGATCACC                          | Primers for qPCR                      |
| q-OCT4-R    | AAAGCGGCAGATGGTTCGTTTGG                         |                                       |
| q-MIXL1-F   | CCCGACATCCACTTGCGCGAG                           |                                       |
| q-MIXL1-R   | GGAAGGATTTCCACTCTGACG                           |                                       |
| q-MESP2-F   | GAACCCACCAGTGCCCTGGAC                           |                                       |
| q-MESP2-R   | TGCAGTCTCTGGCATGATGGGT                          |                                       |
| q-NKX2-5-F  | CTGTCTTCTCCAGCTCCACC                            |                                       |
| q-NKX2-5-R  | TTCTATCCACGTGCCTACAGC                           |                                       |
| q-TNNT2-F   | AAGAGGCAGACTGAGCGGGAAA                          |                                       |
| q-TNNT2-R   | AGATGCTCTGCCACAGCTCCTT                          |                                       |
| q-FBXW7-F   | GTTTGGTCAGCAGTCACAGGCA                          |                                       |
| q-FBXW7-R   | CCACACTTTGAGTGTCCGATCTG                         |                                       |
| q-GAPDH-F   | GAAGGTGAAGGTCGGAGTC                             |                                       |
| q-GAPDH-R   | GAAGATGGTGATGGGATTTTC                           |                                       |
| q-PCNA-F    | CAAGTAATGTCGATAAAGAGGAGG                        |                                       |
| q-PCNA-R    | GTGTCACCGTTGAAGAGAGTGG                          |                                       |
| q-BRCA2-F   | GGCTTCAAAAAGCACTCCAGATG                         |                                       |
| q-BRCA2-R   | GGATTCTGTATCTCTTGACGTTCC                        |                                       |
| q-NUSAP1-F  | CTGACCAAGACTCCAGCCAGAA                          |                                       |
| q-NUSAP1-R  | GAGTCTGCGTTGCCTCAGTTGT                          |                                       |
| q-RACGAP1-F | ATGCTGGCAGACTTTGTGTCCC                          |                                       |
| q-RACGAP1-R | CAGCCAGAGATCCTATACAGGC                          |                                       |
| q-CKS2-F    | GAGGAGACTTGGTGTCCAACAG                          |                                       |
| q-CKS2-R    | GATTTGACGATCCCCAGATAAACT                        |                                       |
| q-CCNA2-F   | CTCTACACAGTCACGGGACAAAG                         |                                       |
| q-CCNA2-R   | CTGTGGTGCTTTGAGGTAGGTC                          |                                       |
| q-CCNB-F    | GACCTGTGTCAGGCTTTCTCTG                          |                                       |
| q-CCNB-R    | GGTATTTTGGTCTGACTGCTTGC                         |                                       |
| q-CCND1-F   | TCTACACCGACAACCTCCATCCG                         |                                       |
| q-CCND1-R   | TCTGGCATTTTGGAGAGGAAGTG                         |                                       |
| q-CCND2-F   | GAGAAGCTGTCTCTGATCCGCA                          |                                       |
| q-CCND2-R   | CTTCCAGTTGCGATCATCGACG                          |                                       |
| q-CDK2-F    | ATGGATGCCTCTGCTCTCACTG                          |                                       |
| q-CDK2-R    | CCCGATGAGAATGGCAGAAAGC                          |                                       |
| q-E2F2-F    | CTCTCTGAGCTTCAAGCACCTG                          |                                       |
| q-E2F2-R    | CTTGACGGCAATCACTGTCTGC                          |                                       |
| FBXW7-F     | GTAATTCTAGGCGATCGCTCGAGTCAGTG<br>GTGCAGGATGTTGG | Primers for luciferase reporter assay |
| FBXW7-R     | TTTTATTGCGGCCAGCGGCCGCGCCAAT<br>GACCACTGGAGAA   |                                       |
| BTG2-F      | GTAATTCTAGGCGATCGCTCGAGTGCTAGT                  |                                       |

|                           |                                                              |                                                                    |
|---------------------------|--------------------------------------------------------------|--------------------------------------------------------------------|
|                           | GCTGCTTTGTGTG                                                |                                                                    |
| BTG2-R                    | TTTTATTGCGGCCAGCGGCCGCCATCCTGG<br>CCAAATGCCCTA               |                                                                    |
| RECK-F                    | GTAATTCTAGGCGATCGCTCGAG<br>GTGCTGATGTAGCATGCTTGT             |                                                                    |
| RECK-R                    | TTTTATTGCGGCCAGCGGCCGC<br>GGAAGGCCTGAAGCTCTCTC               |                                                                    |
| LATS2-F                   | CCGCTCGAGTACTGACAGACTGCCCCACAC                               |                                                                    |
| LATS2-R                   | GAATGCGGCCGCAGAGCGCTGTGAGTAAC<br>AACA                        |                                                                    |
| CDKN1C-F                  | GTAATTCTAGGCGATCGCTCGAG<br>CGGTGAGCCAATTTAGAGCC              |                                                                    |
| CDKN1C-R                  | TTTTATTGCGGCCAGCGGCCGC<br>ATAACCGAGCTAGTGCGTGG               |                                                                    |
| MT-FBXW7-F                | CACGTAAATTTCTTTATTTTCTTCTCCAG                                |                                                                    |
| MT-FBXW7-R                | CTGGTTTGATTTAGAAAGTCTC                                       |                                                                    |
| MT1-BTG2-F                | ACATTGAATGCCCCCTGGGTCCCAGGA                                  |                                                                    |
| MT1-BTG2-R                | AGTGACTGAGAACTCTTGTCC                                        |                                                                    |
| MT2-BTG2-F                | ACATTGAATATACTGTTGTGGGTTGGA                                  |                                                                    |
| MT2-BTG2-R                | AAGTCTACGACAAATTTGGA                                         |                                                                    |
| hsa-miR-25-3p<br>mimics   | 5'-CAUUGCACUUGUCUCGGUCUGA-3'<br>5'-AGACCGAGACAAGUGCAAUGUU-3' | Oligonucleotide<br>sequences of<br>microRNA<br>mimics and<br>siRNA |
| mimic negative<br>control | 5'-UUCUCCGAACGUGUCACGUTT-3'<br>5'-ACGUGACACGUUCGGAGAATT-3'   |                                                                    |
| siFBXW7                   | 5'-CCAAUUGUGUAGACGAUAUAC-3'<br>5'-GUAUAUCGUCUACACAAUUGG-3'   |                                                                    |
| siBTG2                    | 5'-GGUCAUAGAGCUACCGUAUTT-3'<br>5'-AUACGGUAGCUCUAUGACCTT-3'   |                                                                    |
| siNC                      | 5'-UUCUCCGAACGUGUCACGUTT-3'<br>5'-ACGUGACACGUUCGGAGAATT-3'   |                                                                    |
